# Supplementary material for: Identification of anti-HBV activities in Paeonia suffruticosa Andr. using GRP78 as a drug target on Herbochip®
Source: Chin Med. 2017 Apr 24;12:11. doi: 10.1186/s13020-017-0132-2 (PMC5402670; doi:10.1186/s13020-017-0132-2)
Supplement: Supplementary file 2 — Additional file 2. Ethics approval document of Ducklings experiments. [file 13020_2017_132_MOESM2_ESM.pdf]

## 实验动物伦理审批件

|                                                                                     |                         |       |                                                                                      |        |        |
|-------------------------------------------------------------------------------------|-------------------------|-------|--------------------------------------------------------------------------------------|--------|--------|
| 项目名称                                                                                | AP0100 抗乙肝病毒动物体内初步药效学试验 |       |                                                                                      |        |        |
| 项目类别                                                                                | 技术服务                    |       |                                                                                      |        |        |
| 项目来源                                                                                | 云南白药企事业合作               |       |                                                                                      | 经费（万元） | 20.0 万 |
| 申办单位                                                                                | 复旦大学药学院抗病毒研究室           |       |                                                                                      | 单位负责人  | 周珮     |
| 研究部门                                                                                | 抗病毒研究室                  | 项目负责人 | 周珮                                                                                   | 职 称    | 教授     |
| 伦理审查意见                                                                              |                         |       |                                                                                      |        |        |
| Δ 同意                                                                                |                         |       |                                                                                      | Δ      |        |
| Δ 修改后同意                                                                             |                         |       |                                                                                      |        |        |
| Δ 不同意（项目终止或暂停）                                                                      |                         |       |                                                                                      |        |        |
| 审批意见                                                                                |                         |       |                                                                                      |        |        |
| 同意！                                                                                 |                         |       |                                                                                      |        |        |
| 主任（签名）                                                                              |                         |       | 复旦大学药学院抗病毒研究室<br>（盖章）                                                                |        |        |
| 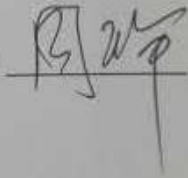 |                         |       | 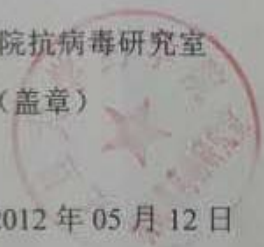 |        |        |
|                                                                                     |                         |       | 2012 年 05 月 12 日                                                                     |        |        |

## Ap0100 抗乙肝病毒动物体内初步药效试验及文献资料

项目负责人：周珮

试验单位：复旦大学药学院

试验参加者：周 伟 黄 海 史训龙 盛德鑫

试验日期：2012.6~2012.8

试验资料保存处：复旦大学药学院

联系人：周 珮

联系电话：02154237431

# Ap0100、GR0113 抗乙肝病毒初步药效试验

## 一、试验目的：

观察 Ap0100（牡丹皮提取物）、GR0113（茜草提取物）体内抗乙肝病毒的药效作用。

## 二、试验材料和检测方法：

1. 毒株：鸭乙肝病毒（DHBV），新鲜分离的阳性麻鸭血清。

2. 动物模型：北京鸭，一日龄，上海青浦金连种禽场提供。

3. 动物试验分组：

牡丹皮组：600mg/kg 剂量组，300mg/kg 剂量组和 150mg/kg 剂量组

茜草组：300mg/kg 剂量组，150mg/kg 剂量组和 75mg/kg 剂量组

4、阳性对照药物：阿德福韦酯 10 mg/kg 剂量组

5、受试药物 Ap0100、GR0113 由云南白药中草药芯片有限公司杨晓源高工提供。

6、血清抗原检测：Dot blot 法

### 方法：

取 5ul 血清点膜（硝酸纤维素膜），PBST 溶液洗涤（3\*10min），30%小牛血清封闭 15min；加入一抗，室温孵育 2 小时，PBST 溶液洗涤（3\*10min）；加入二抗，室温孵育 2 小时，PBST 溶液洗涤（3\*10min）；加入显色液显色，显色后以蒸馏水漂洗终止反应；Image Master TotalLab Software 测定斑点像素，计算抑制率。

### 仪器与试剂：

Image Master VDS 凝胶成像仪（Pharmacia Biotech）

硝酸纤维素膜（GE Healthcare）

Biodancer Hybridization 水浴摇床（NBS）

Arium631 纯水仪（Sartorius）

PBST 溶液：

0.01M PBS + 0.05% Tween 20, pH7.2

显色液:

|                   |     |
|-------------------|-----|
| 4-氯- $\alpha$ -萘酚 | 3mg |
| 甲醇                | 1ml |
| 0.01M PBS, pH7.2  | 5ml |
| 30% $H_2O_2$      | 5ul |

#### 7、血清 DHBV- DNA 检测: 地高辛试剂盒 (Dot-blot)

方法:

取 50ul 血清点样于膜(阳离子尼龙膜), 变性液处理 30min, 中和液 1、2 各处理 15min, 120℃烤膜 30min, 按地高辛试剂盒 (DIG High Prime DNA Labeling and Detection Starter Kit I) 说明完成 Dot-blot 杂交显色, 显色后以蒸馏水漂洗终止反应; Image Master TotalLab Software 测定斑点像素, 计算抑制率。

仪器与试剂:

Image Master VDS 凝胶成像仪 (Pharmacia Biotech)

阳离子尼龙膜 (GE Healthcare)

DHG-9053A 型电热恒温干燥箱 (上海精宏实验设备有限公司)

Hybrigene 杂交仪 (Techne)

地高辛试剂盒 (Roche)

变性液:

|      |          |
|------|----------|
| NaOH | 0.5mol/L |
| NaCl | 1.5mol/L |

中和液 1:

|          |          |
|----------|----------|
| Tris-HCl | 1mol/L   |
| NaCl     | 0.6mol/L |

中和液 2:

|          |          |
|----------|----------|
| Tris-HCl | 0.5mol/L |
| NaCl     | 3mol/L   |

#### 8、肝脏 RNA 提取和检测: 采用 Trizol 试剂盒提取 RNA, 用 Real-time 方法检测肝脏 DHBV copy 数。

### 方法:

取 100mg 肝脏, 加入 1ml Trizol 研磨成匀浆, 离心取上清, 0.2ml 氯仿抽提, 取水相加入 0.5ml 异丙醇沉淀, 离心取沉淀, 1ml 75% 乙醇洗涤, 200ul DEPC 水溶解沉淀, 按 PrimeScript RT reagent Kit With gDNA Eraser 试剂盒完成逆转录, 按 PrimeScript RT Master Mix Perfect Real Time 试剂盒检测 DHBV copy 数。

### 仪器与试剂:

Biofuge Stratos 高速离心机 (Heraeus)

RG-300A Rotor-Gene (Rcorbert)

PrimeScript RT reagent Kit With gDNA Eraser 试剂盒 (Takara)

PrimeScript RT Master Mix Perfect Real Time 试剂盒 (Takara)

DEPC 水:

0.1% DEPC-无菌水

## 9、肝脏 DHBV- DNA 检测: 地高辛试剂盒 (Southern-blot)

### 方法:

取 500mg 肝脏, 加入 6ml 裂解液, 研磨至匀浆, 蛋白酶 K 消化过夜 (55℃), 10ml 酚/氯仿抽提, 4℃ 离心取上清, 加入 12ml 乙醇沉淀, 绕出 DNA, 1ml 75% 乙醇洗涤, 离心取沉淀, 加入 300ul RNA 酶水溶液溶解, 37℃ 过夜, 500ul 酚/氯仿抽提, 离心取上清, 1ml 无水乙醇沉淀, 离心取沉淀, 0.5ml 75% 乙醇洗涤, DNA 37℃ 干燥 30min, 加入 100ul 无菌水溶解, 琼脂糖电泳检测 DNA 浓度。取 20ug DNA 进行 Eco I 酶切, 琼脂糖电泳分离, 胶变性 40min, dH<sub>2</sub>O 洗涤, 中和液中和 2\*30min, 20\*SSC 转膜 (阳离子尼龙膜) 18 小时, 120℃ 烤膜 30min, 按地高辛试剂盒 (DIG High Prime DNA Labeling and Detection Starter Kit I) 说明完成 Southern-blot 杂交显色, 显色后以蒸馏水漂洗终止反应; Image Master TotalLab Software 测定斑点像素, 计算抑制率。

### 仪器与试剂:

Power PAC300 电泳仪 (Bio-Rad)

地高辛试剂盒 (Roche)

裂解液:

Tris-HCl

10mmol/L

|                          |                   |
|--------------------------|-------------------|
| EDTA                     | 0.1mol/L (pH 8.0) |
| SDS                      | 0.5%              |
| 酚/氯仿:                    |                   |
| 饱和酚: 氯仿: 异丙醇 = 25: 24: 1 |                   |
| 变性液:                     |                   |
| NaOH                     | 0.5mol/L          |
| NaCl                     | 1.5mol/L          |
| 中和液:                     |                   |
| Tris-HCl                 | 1mol/L            |
| NaCl                     | 0.5mol/L          |
| 20*SSC:                  |                   |
| 柠檬酸三钠                    | 0.3mol/L          |
| NaCl                     | 3mol/L            |

### 三、Ap0100、GR0113 体内抗鸭乙肝病毒药效试验

一日龄北京雏鸭取血检测，阴性鸭静脉感染病毒后 7-10 天取血检测，去除阴性鸭。将阳性鸭按三个剂量随机分组，口服给药，一日一次，另设病毒对照组（给生理盐水）和阳性药物对照组阿德福韦酯 10mg/kg。给药后第 5、10 天和停药后 3 天取鸭血分离血清。停药后第 3 天杀剖鸭，采血、取肝，检测血清抗原及血清 DHBV-DNA，检测肝脏 DHBV-DNA，并提取肝脏 RNA 采用 Real-time 方法检测肝脏中 DHBV RNA copy 数。

## 四、结果

### 1、对血清抗原的影响

|                | 时间     | 平均值                          | 抑制率  |
|----------------|--------|------------------------------|------|
| 茜草<br>300mg/kg | 0 (天)  | 12599 ±1224.997              |      |
|                | 5 (天)  | 12679.83±1434.351            | 0%   |
|                | 10 (天) | 11761.26 ±1908.933 (p=0.387) | 6.6% |
|                | 13 (天) | 13513.53 ±1312.192           | 0%   |
| 茜草<br>150mg/kg | 0 (天)  | 15603.83±4848.439            |      |
|                | 5 (天)  | 14298.83 ±3111.413 (p=0.591) | 8.4% |

|          |        |                              |       |
|----------|--------|------------------------------|-------|
|          | 10 (天) | 15408.83±3812.097 (p=0.940)  | 0%    |
|          | 13 (天) | 15645.69 ±2847.81 (p=0.986)  | 0%    |
| 茜草       | 0 (天)  | 17825.71 ±2863.617           |       |
| 75mg/kg  | 5 (天)  | 20009.2±3559.495             | 0%    |
|          | 10 (天) | 20160.51±3510.867            | 0%    |
|          | 13 (天) | 20586.33 ±1539.606           | 0%    |
| 牡丹皮      | 0 (天)  | 21645.33 ±5933.101           |       |
| 600mg/kg | 5 (天)  | 16434.83±3143.448 (p=0.087)  | 24.1% |
|          | 10 (天) | 18201.41±3824.76 (p=0.260)   | 15.9% |
|          | 13 (天) | 19766.53 ±5346.253 (p=0.577) | 8.7%  |
| 牡丹皮      | 0 (天)  | 20492.67±3641.49             |       |
| 300mg/kg | 5 (天)  | 18983.5±2597.621 (p=0.428)   | 7.4%  |
|          | 10 (天) | 18066.67±2443.612 (p=0.205)  | 11.8% |
|          | 13 (天) | 19787.5 ±2456.746 (p=0.702)  | 3.4%  |
| 牡丹皮      | 0 (天)  | 21491.5 ±2390.34             |       |
| 150mg/kg | 5 (天)  | 22519.75±1159.865            | 0%    |
|          | 10 (天) | 23996.72±1904.858            | 0%    |
|          | 13 (天) | 27341.52 ±2549.329           | 0%    |
| 阿德福韦酯    | 0 (天)  | 28191.96 ±8559.847           |       |
| 10mg/kg  | 5 (天)  | 22955.41±2379.44 (p=0.179)   | 18.5% |
|          | 10 (天) | 28162.39±2758.868            | 0%    |
|          | 13 (天) | 30050.23±2551.754            | 0%    |

各组对抗原均未为显示显著抑制，见附图 1

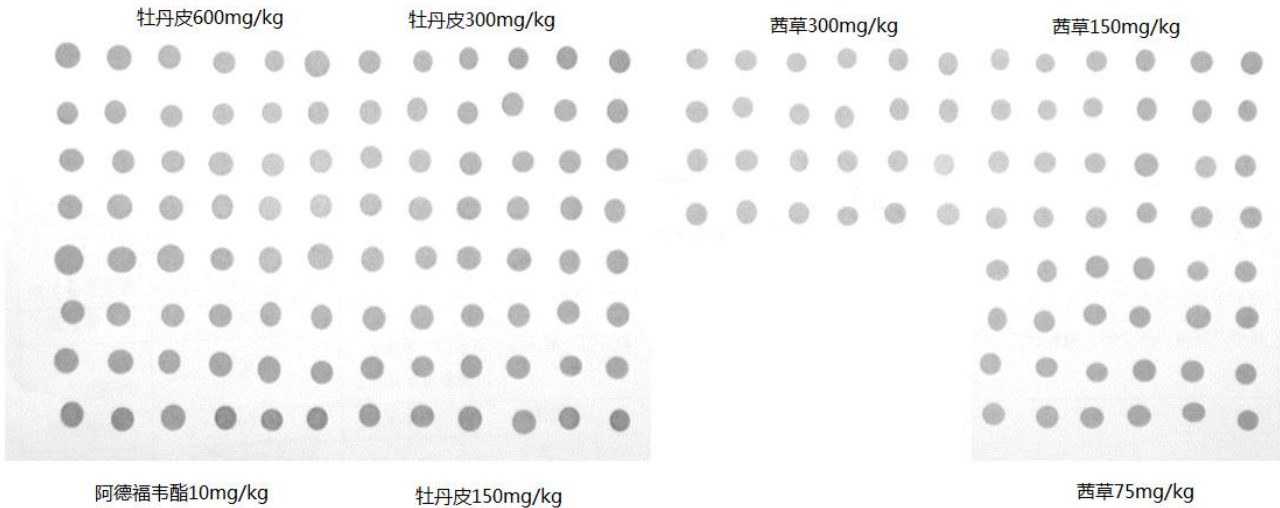

附图 1 对血清抗原的影响

## 2、对肝脏中 DHBV-RNA 复制的影响

| 组别    | 剂量       | 抑制率                     |
|-------|----------|-------------------------|
| 阿德福韦酯 | 10mg/kg  | <b>98.88%</b> (p=0.104) |
| 茵草    | 75mg/kg  | <b>37.46%</b> (p=0.400) |
|       | 150mg/kg | <b>59.60%</b> (p=0.275) |
|       | 300mg/kg | <b>89.58%</b> (p=0.135) |
| 牡丹皮   | 150mg/kg | <b>0</b>                |
|       | 300mg/kg | <b>10.09%</b> (p=0.879) |
|       | 600mg/kg | <b>14.69%</b> (p=0.848) |

以上结果显示：在鸭急性感染模型中，停药 3 天后，茵草提取物对肝脏 DHBV-RNA 水平复制具有明显抑制作用，但与阿德福韦酯 10mg/kg 比较，不如阿德福韦酯。 详见附表 1。

附表 1 对肝脏中 DHBV-RNA 复制的影响

| 组别    |          | 样品号 | 拷贝数      | 平均值      | SD       | 抑制率           |
|-------|----------|-----|----------|----------|----------|---------------|
| 病毒阳性  |          | 24  | 1.72E+03 |          |          |               |
|       |          | 9   | 5.34E+02 |          |          |               |
|       |          | 62  | 1.03E+02 |          |          |               |
|       |          | 64  | 3.45E+03 | 1.45E+03 | 1.50E+03 |               |
| 阿德福韦酯 | 10mg/kg  | 38  | 4.66E-02 |          |          |               |
|       |          | 89  | 6.22E+01 |          |          |               |
|       |          | 25  | 2.59E+00 |          |          |               |
|       |          | 53  | 1.69E-01 | 1.62E+01 | 3.06E+01 | <b>98.88%</b> |
| 茵草    | 小剂量      | 91  | 1.33E+03 |          |          |               |
|       | 75mg/kg  | 79  | 7.21E+02 |          |          |               |
|       |          | 78  | 6.01E+02 |          |          |               |
|       |          | 55  | 1.25E+03 |          |          |               |
|       |          | 40  | 8.18E+02 |          |          |               |
|       |          | 17  | 7.23E+02 | 9.07E+02 | 3.06E+02 | <b>37.46%</b> |
|       | 中剂量      | 6   | 5.54E+02 |          |          |               |
|       | 150mg/kg | 30  | 1.67E+03 |          |          |               |
|       |          | 76  | 3.62E+02 |          |          |               |
|       |          | 11  | 3.16E+02 |          |          |               |
|       |          | 84  | 2.47E+01 | 5.86E+02 | 6.36E+02 | <b>59.60%</b> |
|       | 大剂量      | 59  | 1.62E+02 |          |          |               |
|       | 300mg/kg | 22  | 7.03E+00 |          |          |               |
|       |          | 46  | 3.61E+02 |          |          |               |

|     |          |    |          |          |          |               |
|-----|----------|----|----------|----------|----------|---------------|
|     |          | 70 | 7.44E+01 | 1.51E+02 | 1.54E+02 | <b>89.58%</b> |
| 牡丹皮 | 小剂量      | 16 | 3.85E+07 |          |          |               |
|     | 150mg/kg | 36 | 2.80E+05 |          |          |               |
|     |          | 7  | 1.15E+07 |          |          |               |
|     |          | 34 | 4.56E+07 |          |          |               |
|     |          | 8  | 4.54E-03 | 1.92E+07 | 2.15E+07 | <b>0</b>      |
|     | 中剂量      | 1  | 4.52E+02 |          |          |               |
|     | 300mg/kg | 37 | 4.96E+02 |          |          |               |
|     |          | 74 | 2.58E+03 |          |          |               |
|     |          | 43 | 1.70E+03 | 1.31E+03 | 1.03E+03 | <b>10.09%</b> |
|     | 大剂量      | 82 | 1.01E+03 |          |          |               |
|     | 600mg/kg | 21 | 4.73E+02 |          |          |               |
|     |          | 56 | 7.71E+00 |          |          |               |
|     |          | 61 | 3.46E+03 | 1.24E+03 | 1.54E+03 | <b>14.69%</b> |

### 3、对血清中 DHBV-DNA 复制的影响

| 样品       | 天数 | 抑制率%               |
|----------|----|--------------------|
| 茜草       | 5  | 34.64 (p=0.007) ** |
| 300mg/kg | 10 | 53.77 (p<0.001) ** |
|          | 13 | 56.01 (p<0.001) ** |
| 茜草       | 5  | 25.43 (p=0.021) ** |
| 150mg/kg | 10 | 33.36 (p=0.003) ** |
|          | 13 | 32.79 (p=0.002) ** |
| 茜草       | 5  | 10.77 (p=0.136)    |
| 75mg/kg  | 10 | 11.67 (p=0.321)    |
|          | 13 | 29.47 (p=0.020) ** |
| 牡丹皮      | 5  | 35.28 (p=0.004) ** |
| 600mg/kg | 10 | 19.02 (p=0.114)    |
|          | 13 | 2.38 (p=0.800)     |
| 牡丹皮      | 5  | 41.97 (p=0.054) *  |
| 300mg/kg | 10 | 39.04 (p=0.069)    |
|          | 13 | 20.01 (p=0.316)    |
| 牡丹皮      | 5  | 24.14 (p=0.009) ** |
| 150mg/kg | 10 | 14.46 (p=0.055) *  |
|          | 13 | 0.69 (p=0.964)     |
| 阿德福韦酯    | 5  | 83.72 (p<0.001) ** |
| 10mg/kg  | 10 | 93.11 (p<0.001) ** |
|          | 13 | 24.22 (p<0.005) ** |

以上结果显示：在鸭急性感染模型中，停药 3 天后，茜草提取物对血清 DHBV-DNA 水平复

制具有抑制作用，但与阿德福韦酯 10mg/kg 比较，不如阿德福韦酯。但是它对抑制的反跳在停药后也不是很明显。见附图 2。

附图 2 对血清中 DHBV-DNA 复制的影响

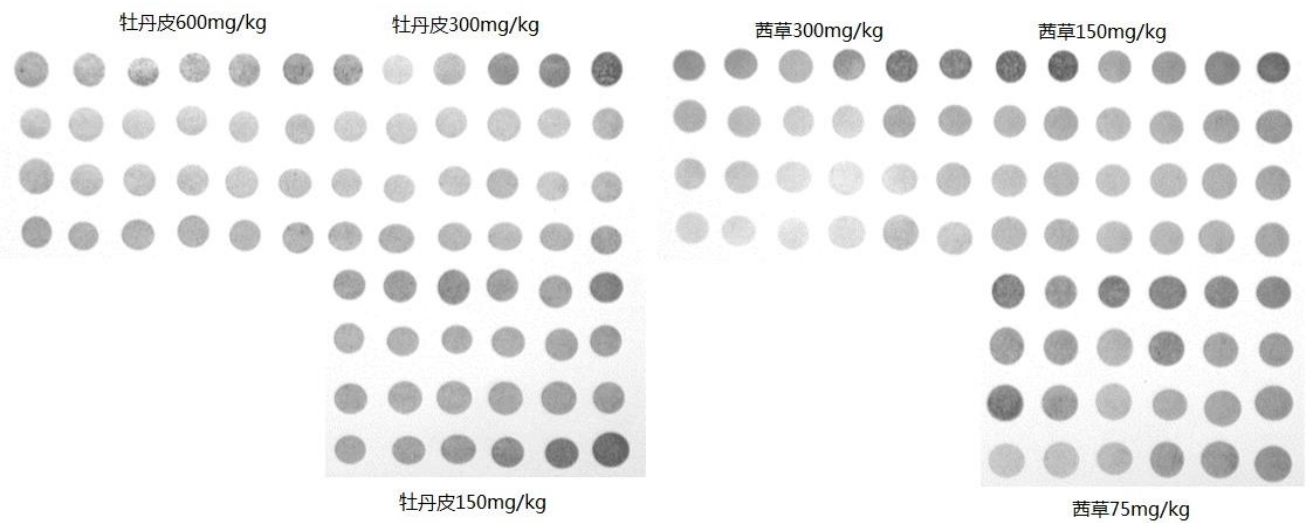

4、对肝脏 DHBV-DNA 复制的影响

| 组别    | 剂量       | 抑制率              |
|-------|----------|------------------|
| 阿德福韦酯 | 10mg/kg  | 46.52% (p<0.001) |
| 茜草    | 300mg/kg | 46.06% (p=0.008) |
|       | 150mg/kg | 32.22% (p=0.002) |
|       | 75mg/kg  | 10.85% (p=0.628) |
| 牡丹皮   | 600mg/kg | 27.55% (p=0.104) |
|       | 300mg/kg | 28.72% (p=0.072) |
|       | 150mg/kg | 13.94% (p=0.479) |

茜草和牡丹皮对肝脏 DHBV-DNA 均有抑制复制作用，见如图 3。

附图 3 对肝脏 DHBV-DNA 复制的影响

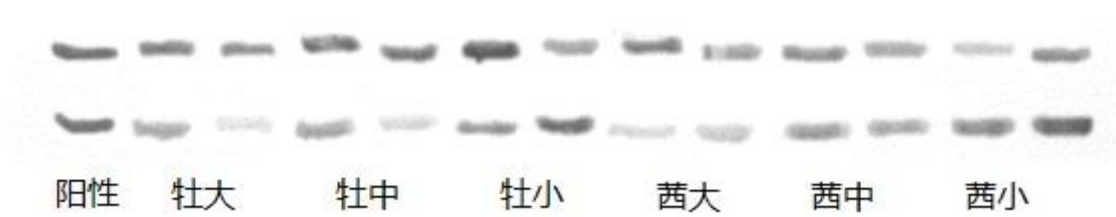

## 5、讨论：

1、以上结果显示茜草的抑制 DHBV-DNA 作用比牡丹皮略好，但是在抑制 DHBV-RNA 复制中茜草作用更为显著。

2、本次实验仅是初步检测，在蛋白方面的工作还要继续探讨。因为粗提物是不是有影响？

## 参考文献：

- 1、中华人民共和国卫生部药政局．新药临床及临床前研究指导原则汇编．1993。
- 2、黄正明，杨新波，曹文斌等．水芹提取物抗鸭乙型肝炎病毒机理的研究．科学通报，1997，17：1863-1867．
- 3、赵艳玲，蔡光明，张新金等．赋肝能抗病毒作用实验研究．中国药学杂志，2001，5：305-308．

报告人： 周 珮

报告日期： 2012.8
